# Supplementary material
Source: publisher figshare collection journal article supplement (https://future-science-group.figshare.com/ndownloader/files/28913592)
Supplement: Supplementary file 1 [file 28913592]

Supplementary Table 1. Demographic and clinical characteristics for melanoma patients in different datasets

| Characteristics | TCGA-Training | TCGA-Validation | GSE54467 | GSE65904 |
| --- | --- | --- | --- | --- |
| Number of Samples | 314 | 157 | 79 | 214 |
| Age, median (range) | 57 (15-90) | 61 (24-86) | 57 (19-84) | 64 (22-91) |
| Sex (%) |  |  |  |  |
| Female | 115 （36.6） | 64 （40.8） | 29 （36.7） | 89 |
| Male | 199 （63.4） | 93 （59.2） | 50 （63.3） | 124 |
| Stage (%) |  |  |  |  |
| Ⅰ | 59 （18.8） | 29 （18.5） | 29 （36.7） | - |
| Ⅱ | 92 （29.3） | 48 （30.6） | 29 （36.7） | - |
| Ⅲ | 114 （36.3） | 57 （36.3） | 20 （25.3） | - |
| Ⅳ | 18 （5.7） | 6 （3.8） | 0 | - |
| Breslow Depth, median (range) | 3 (0-75) | 3.1 (0.01-74) | - | - |
| Clark level |  |  |  |  |
| Ⅰ | 4 （1.3） | 2 （1.3） | - | - |
| Ⅱ | 11 （3.5） | 7 （4.5） | - | - |
| Ⅲ | 57 （18.2） | 20（12.7） | - | - |
| Ⅳ | 113 （36.0） | 55（35.0） | - | - |
| Ⅴ | 33（10.5） | 20（12.7） | - | - |
